# Supplementary material for: Rapid Modulation of Axon Initial Segment Length Influences Repetitive Spike Firing
Source: PubMed Central journal article supplement (PMC4646840; doi:10.1016/j.celrep.2015.09.066), 2015-10-29
Supplement: mmc1.pdf [file mmc1.pdf]

Cell Reports

Supplemental Information

## **Rapid Modulation of Axon Initial Segment**

## **Length Influences Repetitive Spike Firing**

**Mark D. Evans, Adna S. Dumitrescu, Dennis L.H. Kruijssen, Samuel E. Taylor, and  
Matthew S. Grubb**

# Supplemental Data

Figure S1

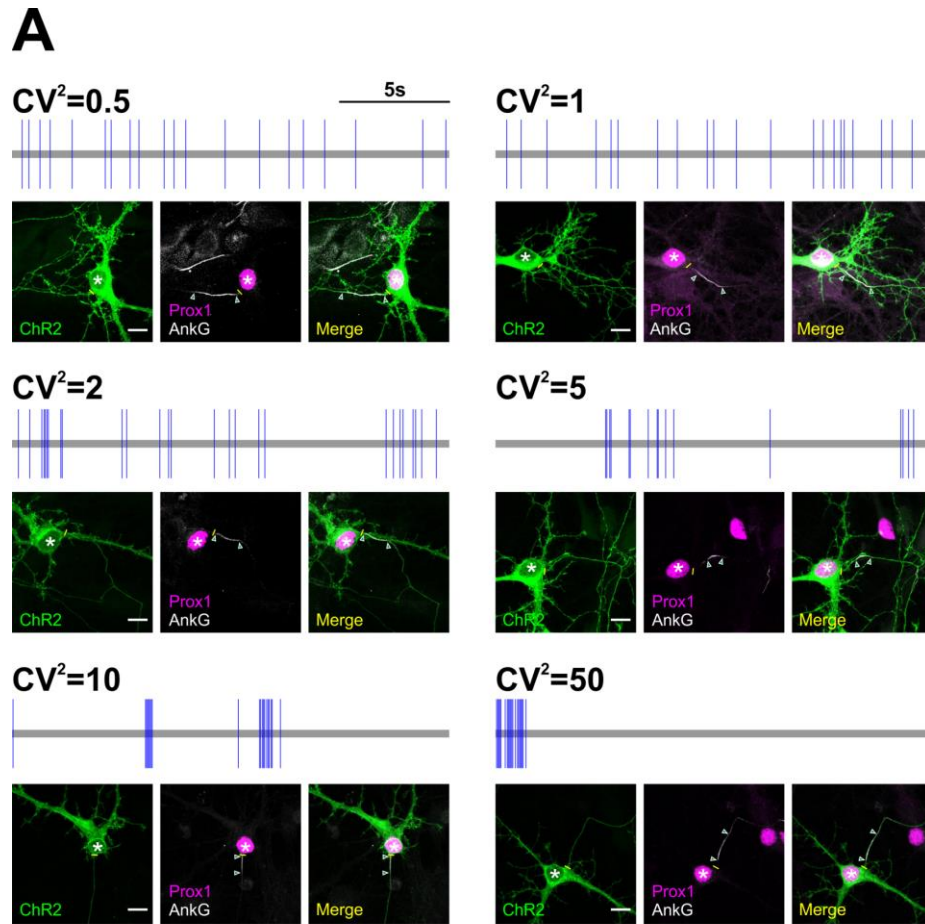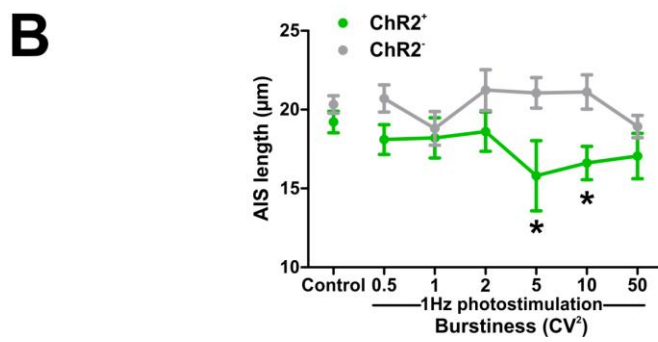

**Figure S1. Rapid AIS plasticity is dependent on burstiness in naturalistic optogenetic stimulation patterns, related to Figure 1.**

- (A) Schematic of photostimulus (top). Each blue bar represents a single 5 ms flash. Inter-flash intervals were sampled randomly from a negative binomial distribution with mean frequency 1 Hz and co-efficient of variation ( $CV^2$ ) as depicted for each group. Maximum intensity projections (bottom) show sparsely channelrhodopsin-2 (ChR2)-expressing cultures co-stained for Prox1 and AnkG after 3 h of each patterned photostimulus. Asterisks mark soma of  $ChR2^+$  DGCs; lines show axon start, arrowheads show DGC AIS start and end positions, scalebar shows 10  $\mu m$ .
- (B) Mean  $\pm$  SEM of AIS length in  $ChR2^+$  and  $ChR2^-$  DGCs in all stimulus groups. Control cells were not photostimulated. Bonferroni post-test after 2-way ANOVA; \*,  $p < 0.05$ .

Figure S2

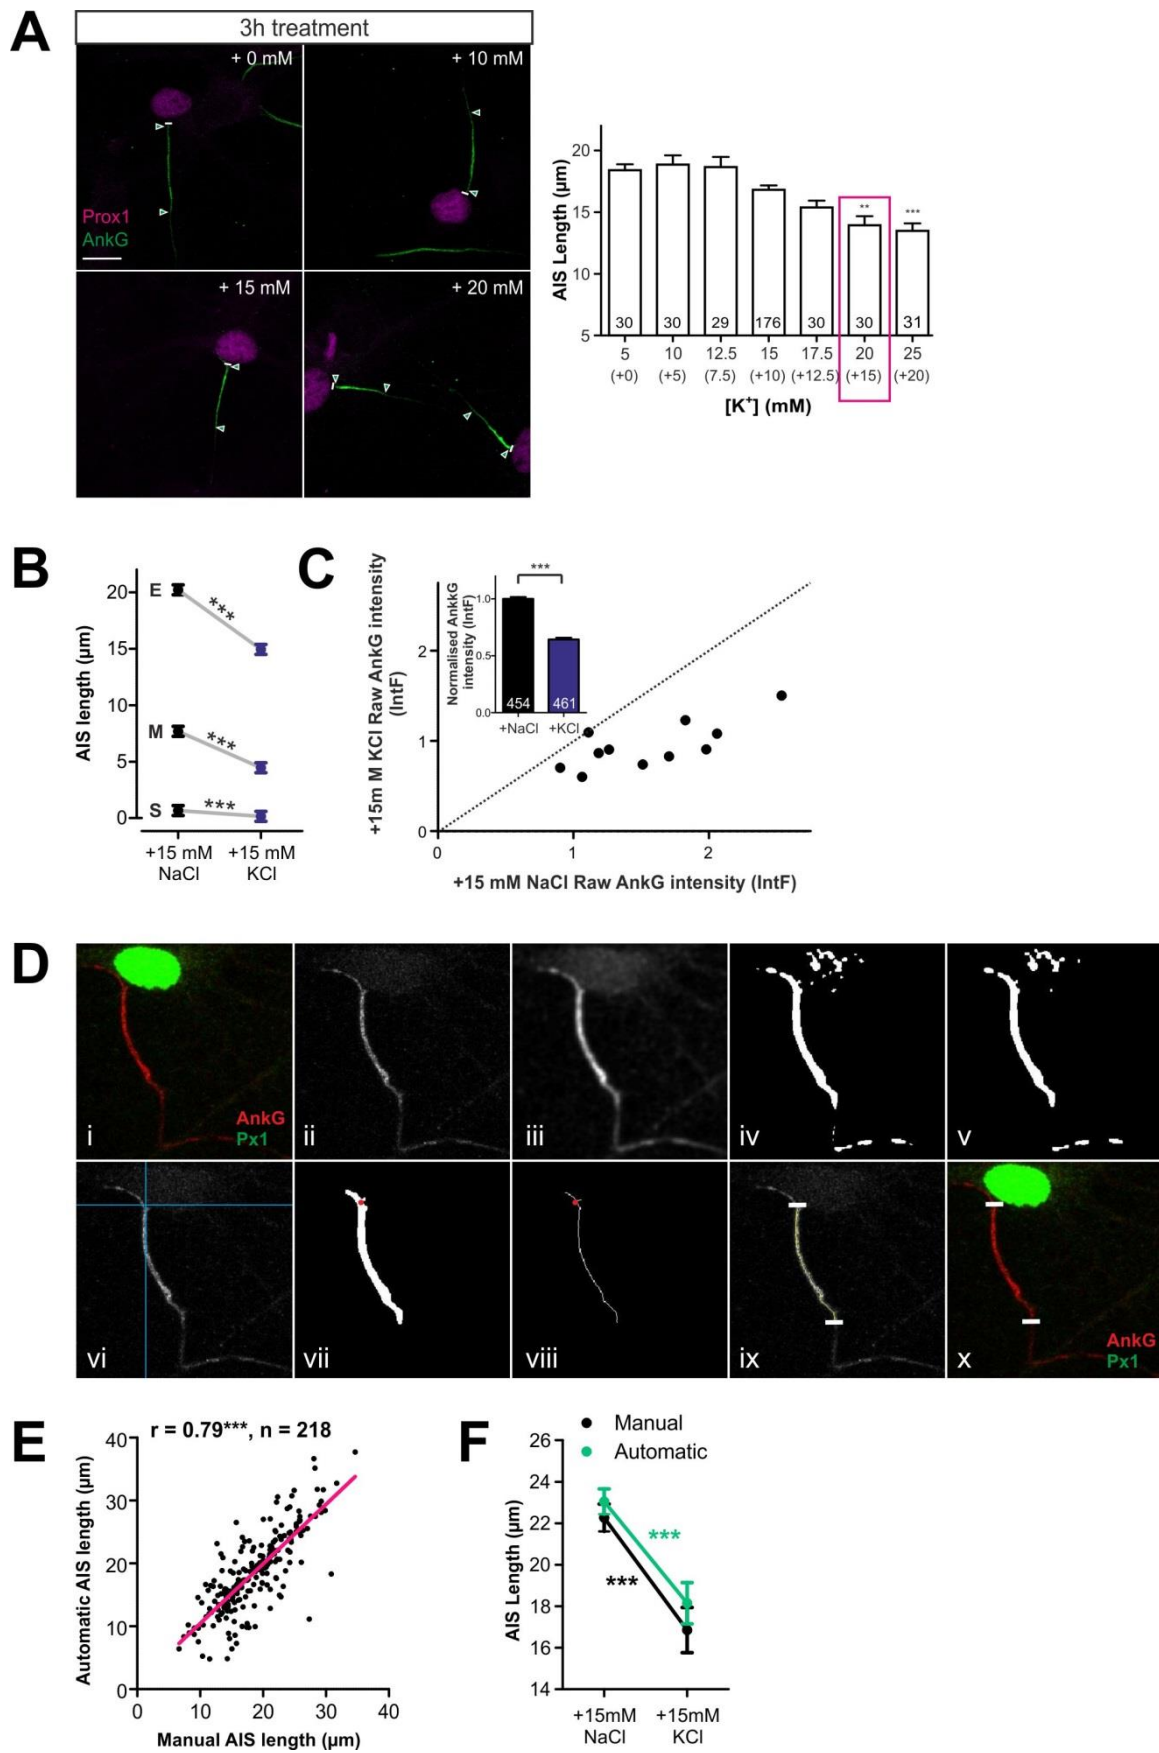

**Figure S2. Characterising rapid shortening of axonal AnkG distributions, related to Figure 2.**

- (A) Maximum intensity projections (left) of DGCs co-labelled for Prox1 and AnkG after 3 h treatment with different  $[K^+]_o$ . Plot (right) shows mean + SEM for AIS length. Magenta rectangle shows KCl concentration chosen for future experiments. Dunn's post-test versus +0 mM after Kruskal-Wallis 1-way ANOVA; \*\*,  $p < 0.01$ ; \*\*\*,  $p < 0.001$ .
- (B) Mean  $\pm$  SEM of AnkG-defined AIS start (S), maximum fluorescence (M) and end (E) positions after 3 h +15 mM NaCl or KCl treatment. Mann-Whitney test; \*\*\*,  $p < 0.001$ .
- (C) Scatter plot of raw integrated AIS AnkG immunofluorescence intensity (IntF) after 3 h +15 mM NaCl versus KCl treatments. Each dot shows the mean for a single experiment; dotted line shows unity. Inset shows mean + SEM IntF across all experiments in both groups, normalised to the mean NaCl value in each experiment. Numbers in bars show cell numbers in each group. Mann-Whitney test; \*\*\*,  $p < 0.001$ .
- (D) Independent quantification of AIS length. A maximum intensity projection of DGC AnkG label (i,ii) is smoothed using a 2D Gaussian (iii). The image is thresholded (iv) and morphologically opened and closed (v) to remove discontinuities before the user indicates the AIS start position (vi, crosshairs; vii, red dot). The single connected element closest to this point is thinned to produce an 'AIS skeleton' one pixel wide (viii) which is fitted with a 2D cubic smoothing spline (ix, yellow line) whose start and end positions define AIS length (ix,x, white lines).
- (E) Scatter plot of DGC AIS lengths measured with manual and automated methods. Each dot shows one cell. Pearson correlation; \*\*\*,  $p < 0.001$ .
- (F) Mean  $\pm$  SEM of AIS length measured using both methods in control and depolarised DGCs. Bonferroni post-test after repeated-measures 2-way ANOVA; \*\*\*,  $p < 0.001$ .

Figure S3

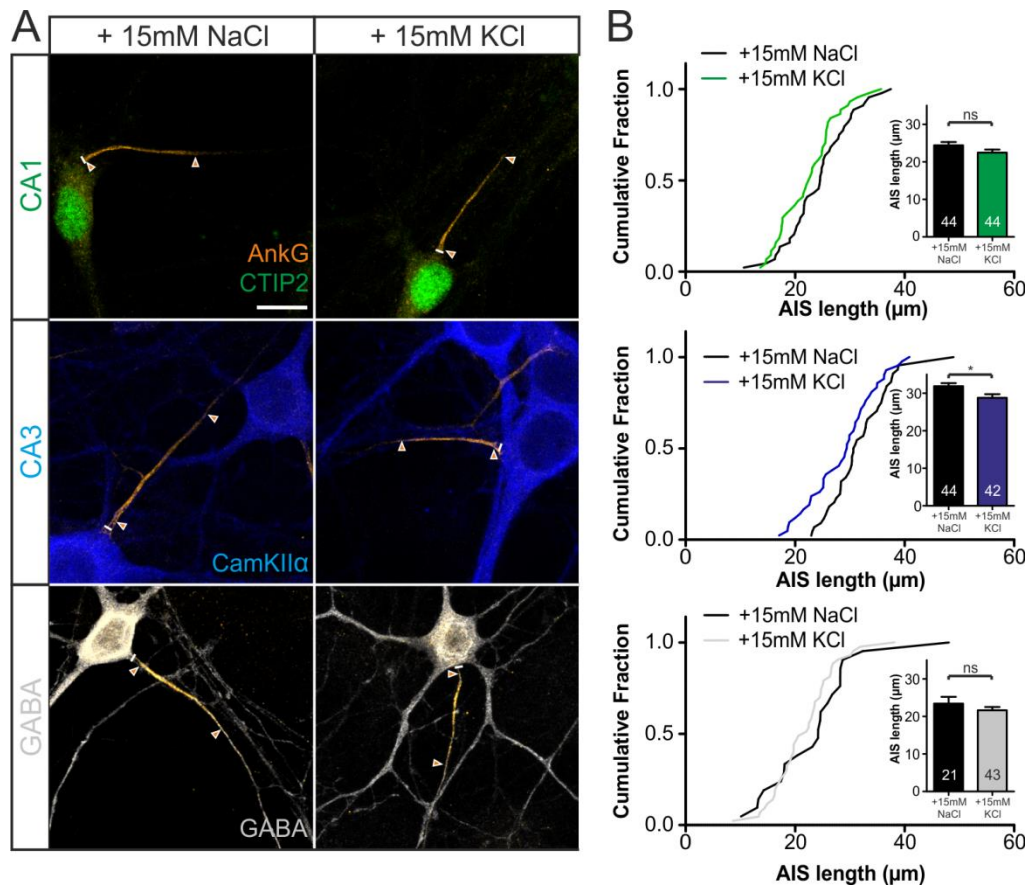

Figure S3. Cell-type specificity of rapid AIS plasticity, related to Figure 2.

- (A) Maximum intensity projections of neurons treated for 3 h with +15 mM NaCl or KCl, then stained for Ankg plus hippocampal cell-type markers to identify CA1, CA3, and GABAergic neurons (see Experimental Procedures). Lines show axon start, arrowheads show AIS start and end positions, scalebar shows 10  $\mu\text{m}$ .
- (B) Cumulative fraction and (inset) mean + SEM of AIS length in both groups for each cell-type. Numbers in bars show cell number in each group. Unpaired t-test (CA1, CA3) or Mann-Whitney test (GABA); \*,  $p < 0.05$ ; ns, non-significant.

**Figure S4**

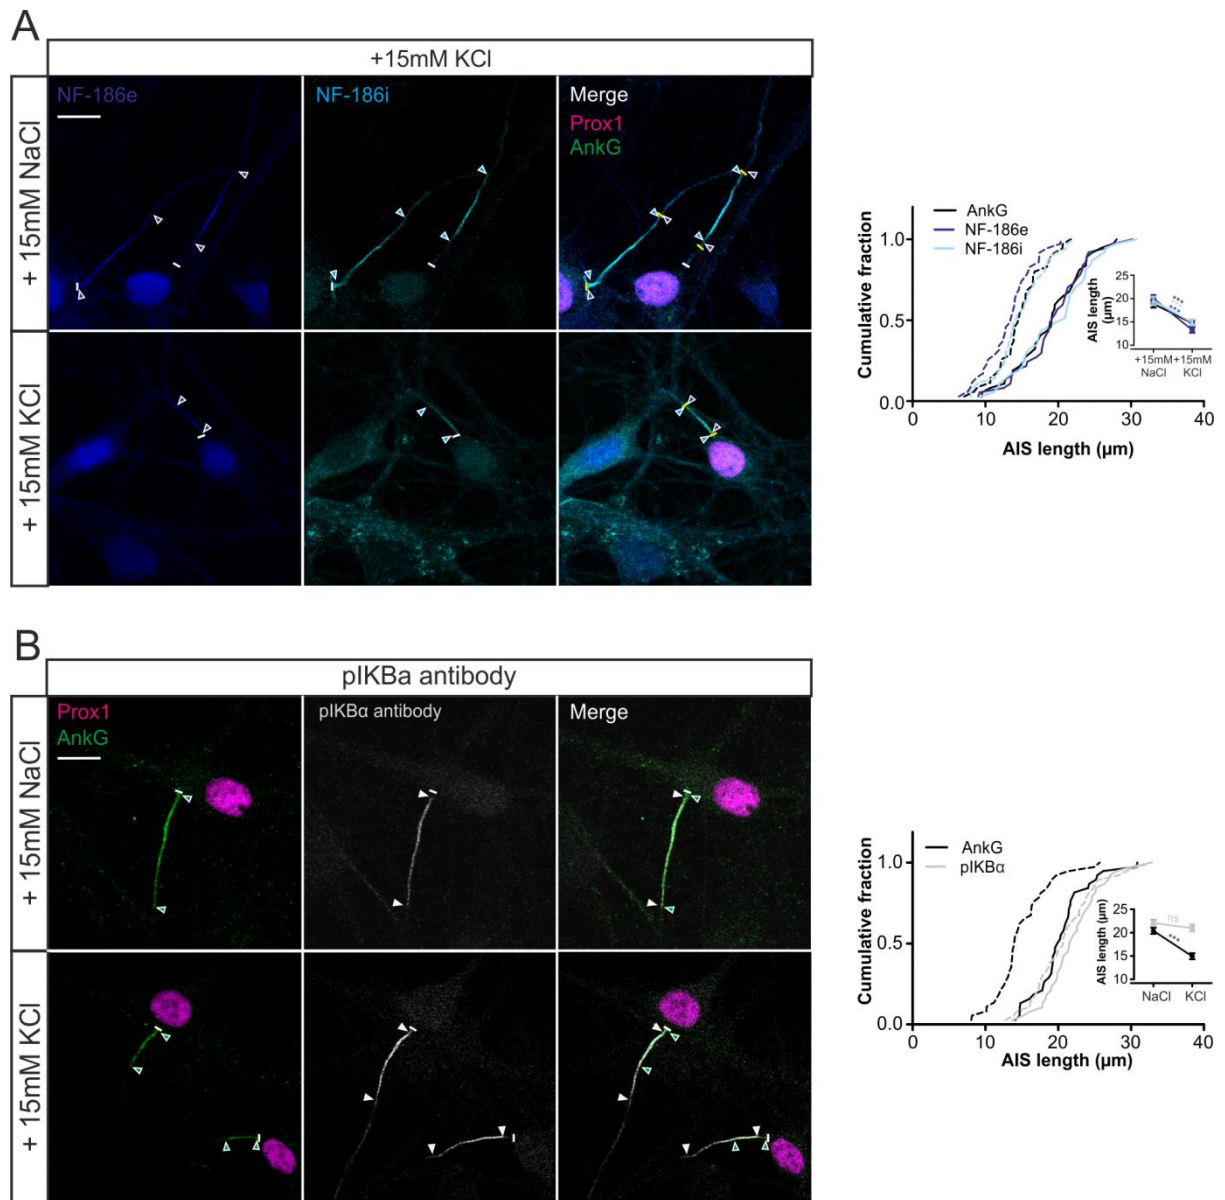

**Figure S4. Differential effects of rapid plasticity on AIS components, related to Figure 3.**

(A) Maximum intensity projections (left) of neurons treated for 3 h with +15 mM NaCl or KCl, then stained for AnkG and prox1, plus extracellular and intracellular pan-neurofascin (NF-ext and NF-int, respectively). White lines show axon start, arrowheads show AIS start and end positions for NF-ext (blue) and NF-int (cyan), yellow lines show AIS start and end positions for AnkG, scalebar shows 10  $\mu$ m. Plots (right) show cumulative fraction and (inset)

mean  $\pm$  SEM of AIS lengths in each group. Bonferroni post-test after repeated-measures 2-way ANOVA; \*\*\*,  $p < 0.001$ .

**(B)** Maximum intensity projections (left) of neurons treated for 3 h with +15 mM NaCl or KCl, then stained for AnkG and prox1, plus the 'p1kB $\alpha$ ' antibody. White lines show axon start, arrowheads show AIS start and end positions for AnkG (green) and p1kB $\alpha$  (white), scalebar shows 10  $\mu$ m. Plots (right) show cumulative fraction and (inset) mean  $\pm$  SEM of AIS lengths in each group. Bonferroni post-test after repeated-measures 2-way ANOVA; \*\*\*,  $p < 0.001$ ; ns, non-significant.



Figure S5

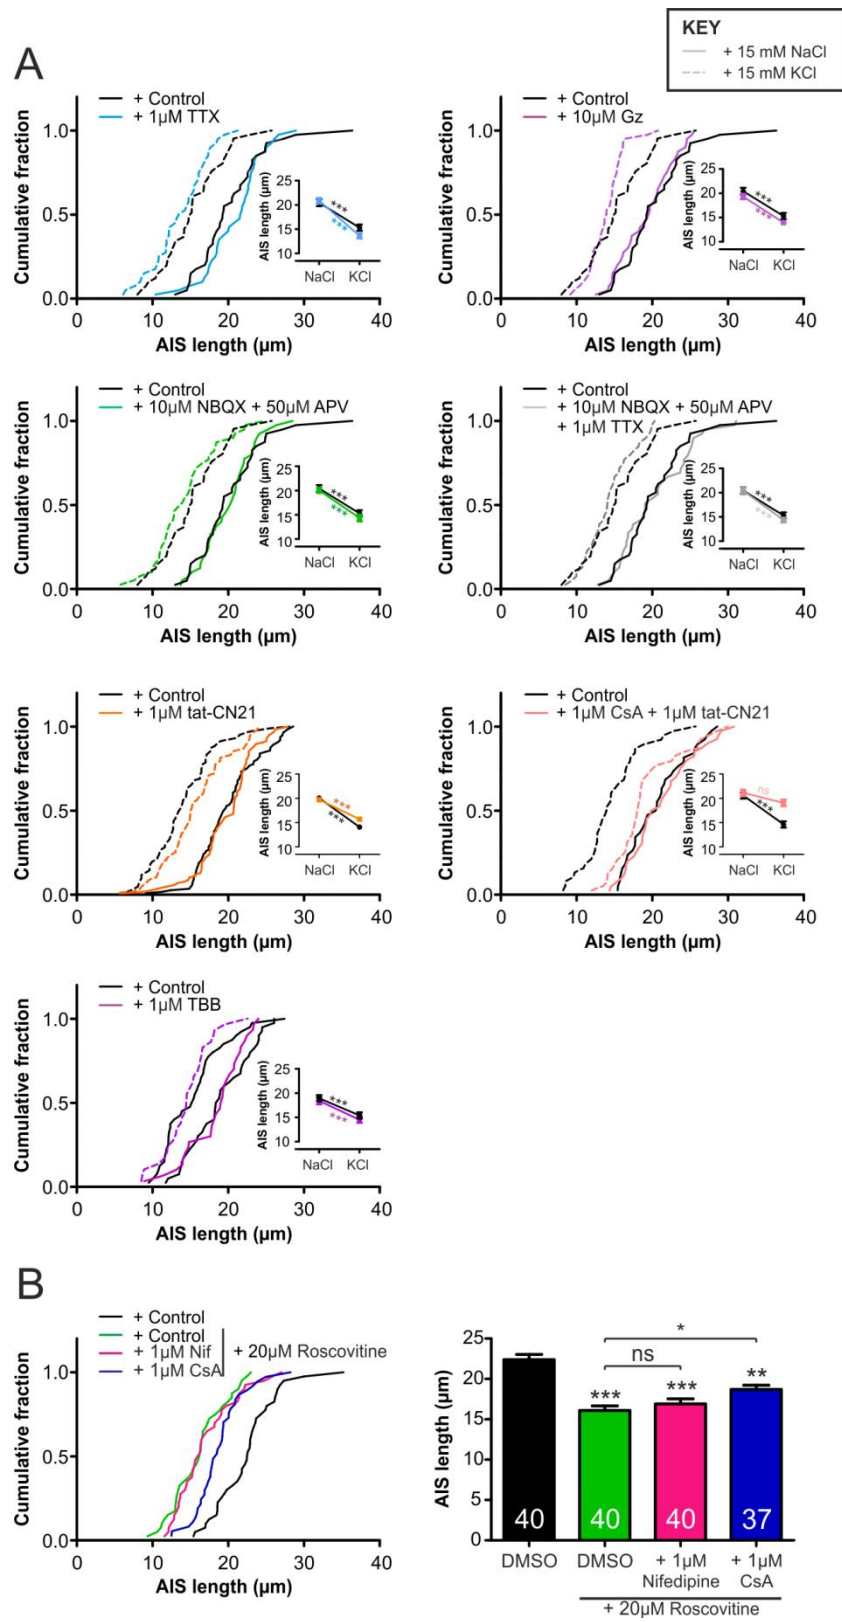

**Figure S5. Signalling pathways in rapid AIS shortening, related to Figure 5.**

- (A) Plots show cumulative fraction and (inset) mean  $\pm$  SEM of AIS lengths following 3 h +15 mM NaCl or KCl treatment in the presence of various pharmacological agents. Gz, gabazine; Bonferroni post-test after 2-way ANOVA; \*\*,  $p < 0.01$ ; \*\*\*,  $p < 0.001$ ; ns, non-significant.
- (B) Cumulative fraction plot (left) of AIS length after 24 h CDK5 inhibition in the presence of L-type calcium channel or calcineurin block. Nif, nifedipine; CsA, cyclosporin A. Mean + SEM plot (right) of AIS length in each group. Numbers in bars show cell numbers in each group. Tukey post-hoc test following one-way ANOVA; \*,  $p < 0.05$ ; \*\*,  $p < 0.01$ ; \*\*\*,  $p < 0.001$ .

**Figure S6**

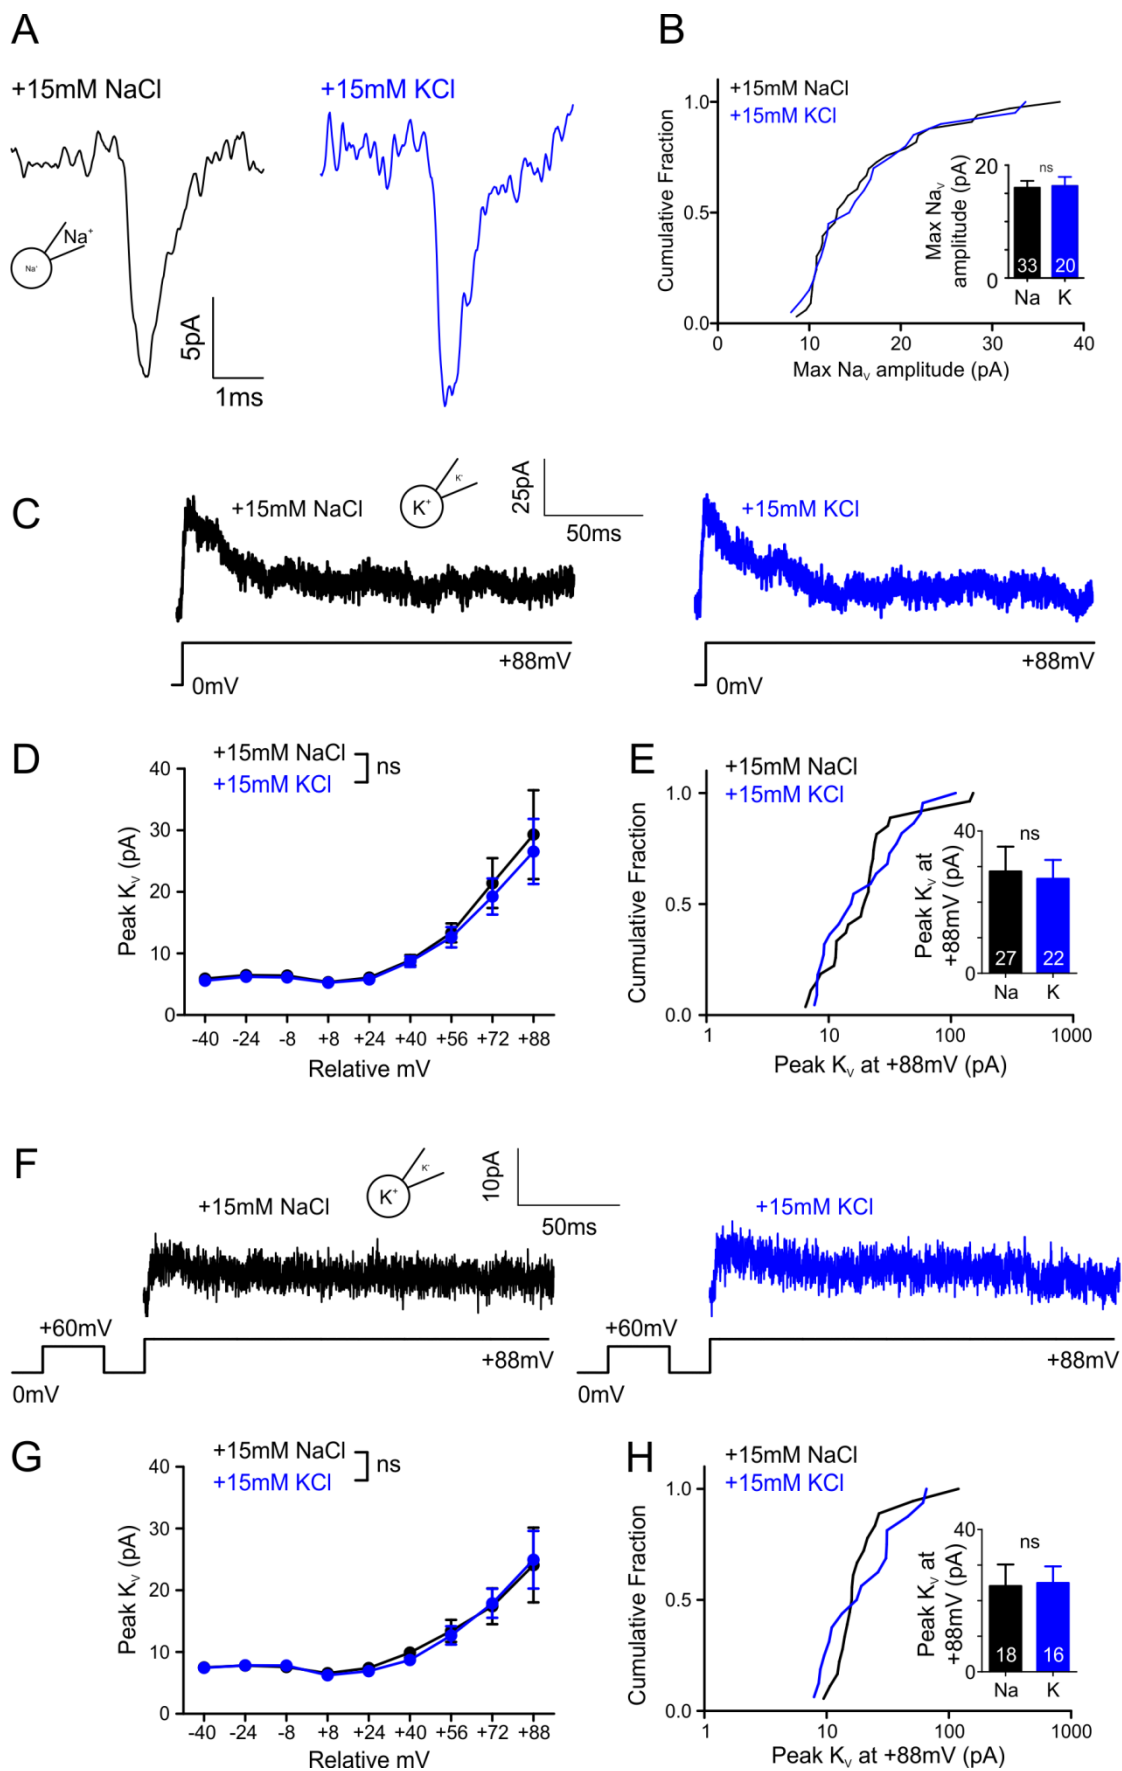

**Figure S6. Somatic Na<sub>v</sub> and K<sub>v</sub> current amplitude is unchanged following 3 h depolarisation, related to Figure 6.**

- (A) Example maximum amplitude somatic Na<sub>v</sub> currents, recorded in cell-attached mode after increasingly depolarised voltage steps from rest in 3 h control and depolarised neurons.
- (B) Cumulative fraction and (inset) mean + SEM of maximum somatic Na<sub>v</sub> amplitude in both groups. Numbers in bars show cell numbers in each group. Mann-Whitney test; ns, non-significant.
- (C) Example ensemble somatic K<sub>v</sub> currents, recorded in cell-attached mode after depolarisation to +88 mV above rest after 3 h +15 mM NaCl or KCl treatment.
- (D) Mean ± SEM peak K<sub>v</sub> amplitude at different relative voltages for both treatment groups. Effect of treatment group in repeated-measures 2-way ANOVA; ns, non-significant.
- (E) Cumulative fraction and (inset) mean + SEM plots for peak somatic K<sub>v</sub> amplitude at +88 mV. Numbers show cell numbers in each group. Mann-Whitney test; ns, non-significant.
- (F) Example somatic cell-attached K<sub>v</sub> currents biased towards I<sub>K</sub>, after inactivation of I<sub>A</sub> components with a brief depolarisation pre-pulse.
- (G) Mean ± SEM peak I<sub>K</sub>-biased K<sub>v</sub> amplitude at different relative voltages for both treatment groups. Effect of treatment group in repeated-measures 2-way ANOVA; ns, non-significant.
- (H) Cumulative fraction and (inset) mean + SEM plots for peak I<sub>K</sub>-biased somatic K<sub>v</sub> amplitude at +88 mV. Numbers show cell numbers in each group. Mann-Whitney test; ns, non-significant.

**Figure S7**

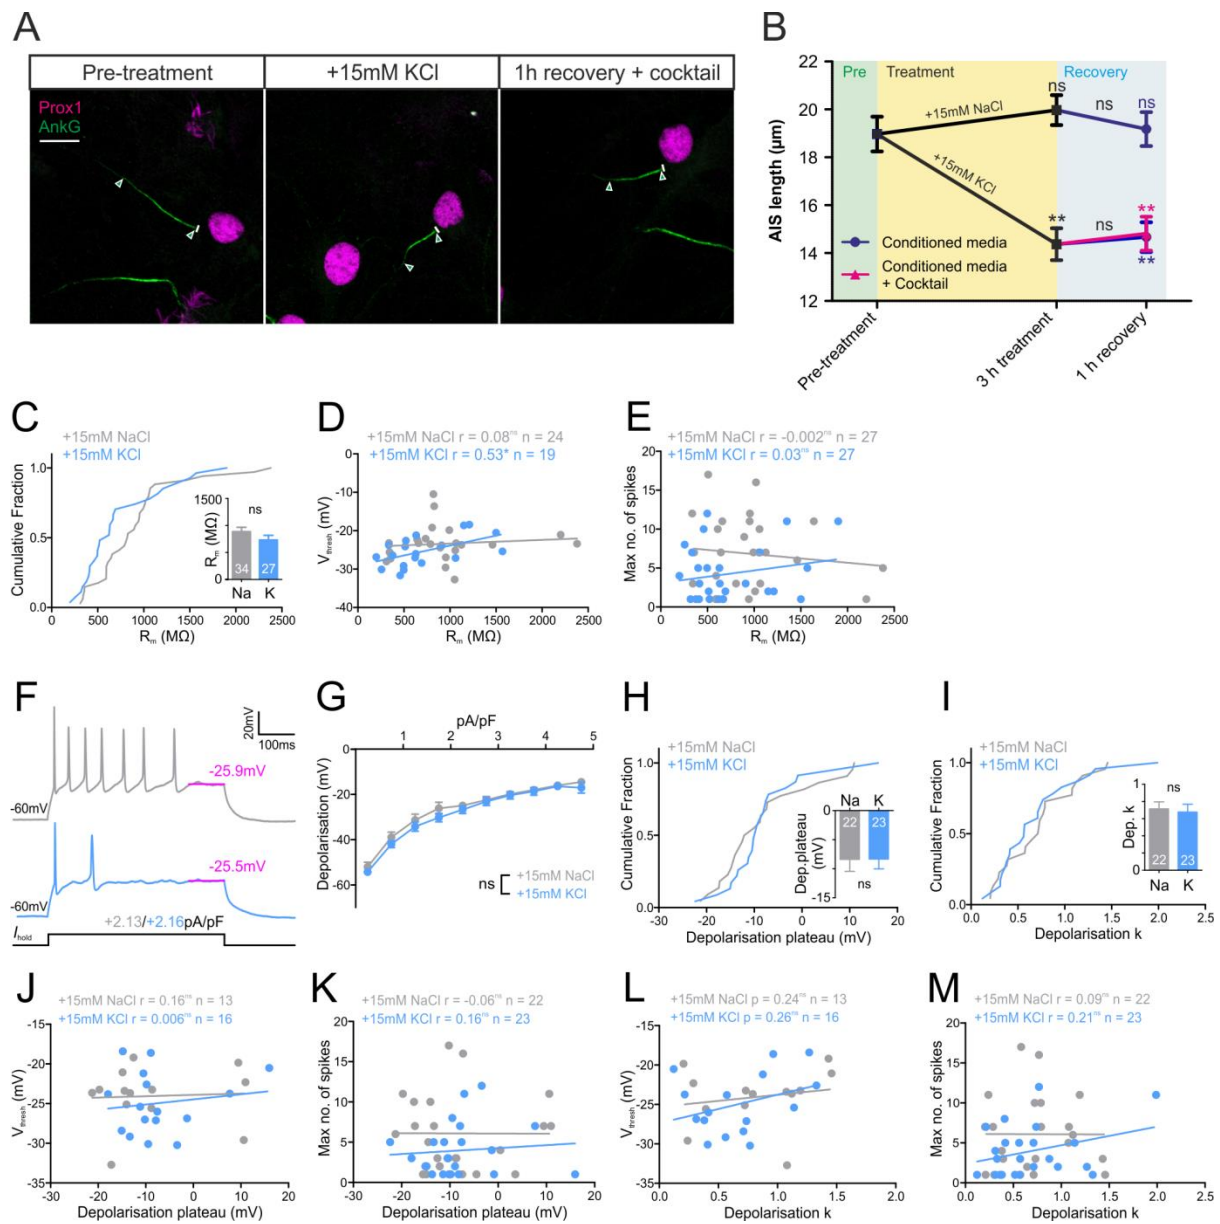

**Figure S7. AIS shortening, membrane resistance, and tonic responses to depolarising current in pro-PKA conditions, related to Figure 7.**

(A) Pro-PKA conditions do not reverse rapid AIS shortening. Maximum intensity projections of neurons pre-depolarisation, after 3 h +15 mM KCl treatment, and after an additional 1 h recovery in a pro-PKA cocktail, co-labelled for AnkG and prox1. Lines show axon start, arrowheads show AIS start and end positions, scalebar shows 10  $\mu\text{m}$ .

- (B) Mean  $\pm$  SEM AIS length in all groups. Dunn's post-test following Kruskal-Wallis one-way ANOVA; symbols above data points show tests versus pre-treatment group; symbols above connecting lines show tests between connected groups; \*\*,  $p < 0.01$ ; ns, non-significant.
- (C) Cumulative fraction plot and (inset) mean + SEM of membrane resistance ( $R_m$ ) in pro-PKA conditions after 3 h +15 mM NaCl or KCl treatment. Numbers in bars show cell numbers in each group. Mann-Whitney test; ns, non-significant.
- (D) & (E) Scatter plots of  $R_m$  versus voltage threshold (D) and maximum spike number (E) in both treatment groups. Each dot shows one cell; lines show best fit linear regression. Spearman correlation; \*,  $p < 0.05$ ; ns, non-significant.
- (F) Example current-clamp traces showing tonic depolarisation (magenta) in control and 3 h depolarised neurons at  $\sim 2.15$  pA/pF 500 ms current injection.
- (G) Mean  $\pm$  SEM tonic depolarisation at different amplitudes of current injection for both groups. Mixed model effect of treatment group; ns, non-significant.
- (H) & (I) Cumulative fraction and (inset) mean & SEM plots for parameters of exponential fits to current versus depolarisation response curves in individual neurons: plateau depolarisation (dep.; H) and rate constant  $k$  (I). Numbers in bars show cell numbers in each group. Mann-Whitney test; ns, non-significant.
- (J) to (M) Scatter plots of fitted tonic depolarisation parameters versus voltage threshold (J, L) and maximum spike number (K, M) in both treatment groups. Each dot shows one cell; lines show best fit linear regression. Spearman correlation; \*,  $p < 0.05$ ; ns, non-significant.

**Table S1.**

| Parameter                | Mean $\pm$ SEM (n)    |                       | Group comparison                | Correlation with AIS Length        |                      |
|--------------------------|-----------------------|-----------------------|---------------------------------|------------------------------------|----------------------|
|                          | +15 mM NaCl           | +15 mM KCl            |                                 | +15 mM NaCl                        | +15 mM KCl           |
| $R_m$ (M $\Omega$ )      | 911 $\pm$ 92 (35)     | 679 $\pm$ 50 (33)     | <b><i>U = 413 p = 0.044</i></b> | Sr = -0.24 p = 0.17                | Sr = -0.014 p = 0.94 |
| $C_m$ (pF)               | 34.9 $\pm$ 1.4 (35)   | 33.5 $\pm$ 1.2 (33)   | t = 0.75 p = 0.46               | <b><i>Pr = 0.36 p = 0.033</i></b>  | Pr = 0.18 p = 0.31   |
| $V_{\text{thresh}}$ (mV) | -24.3 $\pm$ 0.7 (34)  | -25.4 $\pm$ 0.7 (32)  | t = 1.07 p = 0.29               | <b><i>Pr = -0.39 p = 0.022</i></b> | Pr = -0.15 p = 0.41  |
| $V_{\text{max}}$ (mV)    | 32.8 $\pm$ 1.9 (34)   | 30.8 $\pm$ 2.1 (32)   | t = 0.72 p = 0.47               | Pr = 0.15 p = 0.40                 | Pr = -0.039 p = 0.83 |
| Max dVdt (V/s)           | 99.8 $\pm$ 8.1 (34)   | 89.0 $\pm$ 9.5 (32)   | t = 0.87 p = 0.39               | Pr = 0.17 p = 0.34                 | Pr = 0.022 p = 0.91  |
| AP width (ms)            | 1.68 $\pm$ 0.10 (34)  | 1.85 $\pm$ 0.11 (32)  | U = 435 p = 0.16                | Sr = -0.11 p = 0.52                | Sr = 0.11 p = 0.55   |
| Rheobase (pA/pF)         | 0.75 $\pm$ 0.12 (16)  | 1.10 $\pm$ 0.18 (16)  | <i>U = 80 p = 0.073</i>         | Sr = -0.33 p = 0.22                | Sr = 0.27 p = 0.32   |
| AHP (mV)                 | -40.6 $\pm$ 1.6 (16)  | -41.2 $\pm$ 1.7 (16)  | U = 106 p = 0.42                | <i>Sr = 0.46 p = 0.072</i>         | Sr = 0.26 p = 0.34   |
| Max no. of spikes        | 5.29 $\pm$ 0.99 (24)  | 4.15 $\pm$ 0.63 (27)  | U = 297 p = 0.61                | Sr = 0.003 p = 0.99                | Sr = -0.27 p = 0.18  |
| Dep. plateau (mV)        | -9.84 $\pm$ 1.54 (15) | -9.96 $\pm$ 1.80 (23) | t = 0.044 p = 0.97              | Pr = 0.21 p = 0.46                 | Pr = 0.004 p = 0.99  |
| Dep. K                   | 0.73 $\pm$ 0.09 (15)  | 0.70 $\pm$ 0.07 (23)  | t = 0.26 p = 0.80               | Pr = -0.021 p = 0.94               | Pr = 0.11 p = 0.63   |

**Supplemental Table 1. Physiological parameters of DGCs recorded under baseline conditions, related to Figure 6.** Group comparisons show results of Mann-Whitney U test or unpaired t-test, and correlations report Spearman's r (Sr) or Pearson's r (Pr), for non-parametric and parametric datasets, respectively. Italics highlight tests where  $p < 0.1$ ; bold highlights tests where  $p < 0.05$ ; Dep., depolarisation.

**Table S2.**

| Parameter                | Mean $\pm$ SEM (n)    |                       | Group comparison                 | Correlation with AIS Length       |                                    |
|--------------------------|-----------------------|-----------------------|----------------------------------|-----------------------------------|------------------------------------|
|                          | +15 mM NaCl           | +15 mM KCl            |                                  | +15 mM NaCl                       | +15 mM KCl                         |
| $R_m$ (M $\Omega$ )      | 886 $\pm$ 80 (34)     | 732 $\pm$ 86 (27)     | U = 352 p = 0.12                 | <i>Sr = -0.33 p = 0.053</i>       | Sr = -0.02 p = 0.92                |
| $C_m$ (pF)               | 31.3 $\pm$ 1.2 (35)   | 33.8 $\pm$ 1.3 (27)   | U = 359 p = 0.11                 | <i>Sr = 0.30 p = 0.078</i>        | Sr = -0.03 p = 0.89                |
| $V_{\text{thresh}}$ (mV) | -23.4 $\pm$ 0.9 (24)  | -25.3 $\pm$ 0.9 (19)  | U = 167 p = 0.14                 | <b><i>Sr = -0.44 p = 0.03</i></b> | <b><i>Sr = -0.64 p = 0.003</i></b> |
| $V_{\text{max}}$ (mV)    | 30.4 $\pm$ 2.5 (24)   | 30.3 $\pm$ 3.3 (19)   | t = 0.04 p = 0.97                | Pr = 0.31 p = 0.14                | Pr = 0.38 p = 0.11                 |
| Max dVdt (V/s)           | 112 $\pm$ 12 (24)     | 120 $\pm$ 17 (19)     | t = 0.39 p = 0.70                | Pr = 0.29 p = 0.17                | <i>Pr = 0.40 p = 0.09</i>          |
| AP width (ms)            | 1.59 $\pm$ 0.14 (24)  | 1.46 $\pm$ 0.14 (19)  | U = 205 p = 0.58                 | Sr = -0.28 p = 0.18               | Sr = -0.31 p = 0.20                |
| Rheobase (pA/pF)         | 1.29 $\pm$ 0.14 (26)  | 1.70 $\pm$ 0.25 (23)  | U = 248 p = 0.31                 | Sr = -0.06 p = 0.76               | Sr = 0.07 p = 0.75                 |
| AHP (mV)                 | -40.0 $\pm$ 1.1 (26)  | -39.0 $\pm$ 1.2 (23)  | U = 290 p = 0.86                 | Sr = 0.15 p = 0.46                | Sr = 0.03 p = 0.89                 |
| Max no. of spikes        | 6.96 $\pm$ 0.87 (28)  | 4.26 $\pm$ 0.68 (27)  | <b><i>t = 2.43 p = 0.019</i></b> | <b><i>Pr = 0.52 p = 0.005</i></b> | <b><i>Pr = 0.58 p = 0.001</i></b>  |
| Dep.plateau (mV)         | -8.38 $\pm$ 2.06 (22) | -8.33 $\pm$ 1.69 (23) | U = 235 p = 0.69                 | Sr = 0.008 p = 0.97               | Sr = 0.31 p = 0.15                 |
| Dep. K                   | 0.71 $\pm$ 0.08 (22)  | 0.68 $\pm$ 0.09 (23)  | U = 231 p = 0.62                 | Sr = -0.22 p = 0.33               | Sr = -0.07 p = 0.74                |

**Supplemental Table 2. Physiological parameters of DGCs recorded under pro-PKA conditions, related to Figure 7.** Group comparisons show results of Mann-Whitney U test or unpaired t-test, and correlations report Spearman's r (Sr) or Pearson's r (Pr), for non-parametric and parametric datasets, respectively. Italics highlight tests where p < 0.1; bold highlights tests where p < 0.05; Dep., depolarisation.



**Table S3**

| <b>Antigen</b>             | <b>Species</b>      | <b>Isotype</b> | <b>Supplier</b>       | <b>Working dilution</b> |
|----------------------------|---------------------|----------------|-----------------------|-------------------------|
| Ankyrin-G                  | Mouse (monoclonal)  | IgG2a          | NeuroMab (N106/36)    | 1:500                   |
| $\alpha$ CaMKII            | Mouse (monoclonal)  | IgG1           | Millipore             | 1:1000                  |
| CTIP2                      | Rat (monoclonal)    |                | Abcam                 | 1:1000                  |
| GABA                       | Rabbit (polyclonal) |                | Sigma                 | 1:1000                  |
| Na <sub>v</sub> 1.2        | Mouse (monoclonal)  | IgG2a          | NeuroMab (K69/3)      | 1:1000                  |
| Pan-Na <sub>v</sub>        | Mouse (monoclonal)  | IgG1           | Sigma                 | 1:100                   |
| Pan-Neurofascin (external) | Mouse (monoclonal)  | IgG2a          | NeuroMab (A12/18)     | 1:500                   |
| Pan-Neurofascin (internal) | Mouse (monoclonal)  | IgG1           | NeuroMab (L11A/41)    | 1:500                   |
| 'p1kB $\alpha$ '           | Rabbit (monoclonal) |                | Cell Signaling (14D4) | 1:500                   |
| Prox1                      | Rabbit (polyclonal) |                | Sigma                 | 1:1000                  |

**Supplemental Table 3. Primary antibodies, related to Experimental Procedures.**
